# Supplementary material for: In vivo cartilage-formation potency of somatic stem cells is associated with responsiveness to TGFβ stimulation in vitro
Source: Research Square preprint supplement (doi:10.21203/rs.3.rs-385690/v1), 2021-04-05
Supplement: Supplementary file 1 [file 44efdb98191b4afad6e3f168.docx]

**Supplemental legends**

**Table.S1**

The information for donors.

**Table.S2**

The information for immunohistochemistry

**Table.S3**

Primer list

**Table.S4**

Transcripts per million values of RNA-seq analysis

**Figure.S1**

Chondrogenic pellet culture of mASCs and mSSCs in chondrogenic basal media at day 14. Representative data of macroscopic images and histology are shown.

**Figure.S2**

Gene expression of chondrogenic marker in the mASCs and mSSCs cultured with BMP2, TGFβ1, or their combination at day 14. Data are collected from over three independent lots and presented as a box plot with dot plot.

**Figure.S3**

Histological features for fibrous cartilage or ectopic cartilage development after transplantation with mouse ASCs.

**Figure.S4**

Extended data in mouse SSCs transplantation group without in vivo chondrogenesis. (**A**) In samples which defect site is close to enthesis, host synovial tissue infiltrated to defect site and inhibited in vivo chondrogenesis, but transplanted mSSCs existed within granulation tissue with unspecified state. (**B**) Synovial infusions must be observed in samples with patellar dislocation. Notably, IHC for GFP implies vessel like structure built by transplanted mSSCs. (**C**) In the samples with in vivo chondrogenesis, transplanted mSSCs existed with unspecified state in bone marrow region underneath neo cartilage.

**Figure.S5**

**(A)** Saf-O and IHC for pSmad1 and pSmad2 of in vivo specimens of transplanted with mSSCs or mASCs. Representative data are shown. Scale bars = 100 μm.

**(B)** Western blot analysis of Smads in mSSCs and mASCs in two dimensions culture. Representative images from two lots are shown. Signal intensity of pSmad1/5 and pSmad2 relative to GAPDH are shown as line graph which shape of points represent individual cell lots.

**(C)** Extended images of western blotting during 14 days chondrogenic culture in other two lots of mASCs and mSSCs.

**Figure.S6**

The alteration of gene expression of TGFβ superfamily receptors **(A)**, ligands, and chondrogenic markers **(B)** during chondrogenic culture of mSSCs and mASCs. Data are expressed as Mean±SD for each lot, and each shape of points represent individual lots.

**Figure.S7**

Extended data and IHC for adipocyte marker, Perilipin in chondrogenic pellet cultured with BMP2, TGFβ1, and/or receptor inhibitors; SB-431542 and LDN-193189. Representative images are shown **(A)** and their measurement of positive stained are presented as a box plot (**B**).

**Figure.S8**

Inhibition of TGFβ1 induced chondrogenesis of mSSCs with higher dose of LND-193189. Representative Safranin-O staining from three independent lots is shown and their measurement of positive stained are presented as a box plot with dot plot.

**Figure.S9**

Pearson correlation analysis between measurements of histological images in chondrogenic pellet cultured with BMP2, TGFβ1, and their combination. **(A)** Correlation between proteoglycan and COL2 of hSSCs. **(B,C)** Correlation between fibrous marker and COL2 of hASCs. Each circle represents individual six donors, and circle size reflects standard deviation for the data plotted in Y axis.

**Figure.S10**

Histological images for donor3_hSSCs and donor5_hSSCs cultured with BMP2 or TGFβ1 for 28 days. Scale bars = 500 μm.

**Figure.S11**

RNA-seq analysis of hASCs and hSSCs in donor1, 2, and 5 before chondrogenic culture. **(A)** Hierarchical clustering based on top 2000 genes with high standard deviation. **(B,C,D)** Heatmaps for genes collected from several gene set related in TGFβ receptor signaling, Proteoglycan, and Chondrogenesis/Cartilage development.

**Figure.S12**

Micro-CT and histological images in the all samples transplanted with hASCs.

**Figure.S13**

Micro-CT and histological images in the samples transplanted with hSSCs. IHC images for COL2 with red frame have the area positively stained, and images with blue frame were except for quantification because of non-specific staining. IHC images for SOX9 with yellow frame represents the presence of SOX9 positive cells.

**Figure.S14**

(A, B) Representative images for IHC for hVimentin and TRAP staining from the samples transplanted with hASCs or hSSCs at day 28. Arrow heads indicate bone erosion spots. The number of TRAP positive spot at border between neo tissue and host bone or articular cartilage are expressed as a bar plot with a dot plot. Bars = 100 µm.
