# Supplementary material for: In vivo cartilage-formation potency of somatic stem cells is associated with responsiveness to TGFβ stimulation in vitro
Source: Research Square preprint supplement (doi:10.21203/rs.3.rs-385690/v1), 2021-04-05
Supplement: Supplementary file 17 [file b3960944aab50bd4bca9f9fd.xlsx]

## Sheet: Sheet1
Donor No.	Age	Gender	Surgery	KL grade
1	77	Female	TKA	III
2	65	Female	TKA	III
3	70	Female	TKA	III
4	80	Female	TKA	IV
5	79	Female	TKA	III
6	69	Female	TKA	III
